# Supplementary material for: Mowing Facilitated Shoot and Root Litter Decomposition Compared with Grazing
Source: MDPI journal article supplement (doi:10.3390/plants11070846), 2022-03-23
Supplement: s1 [file s1]

## Supplemental information

**Table S1.** Main species composition of the study plot

| Treatment               | Main Species                   | Important Value |
|-------------------------|--------------------------------|-----------------|
| Low altitude + Mowing   | <i>Bromus inermis</i>          | 0.37±0.03       |
|                         | <i>Elymus repens</i>           | 0.19±0.03       |
|                         | <i>Medicago sativa</i>         | 0.18±0.02       |
|                         | <i>Onobrychis viciifolia</i>   | 0.07±0.02       |
| Low altitude + Grazing  | <i>Achnatherum inebrians</i>   | 0.45±0.05       |
|                         | <i>Stipa capillata</i>         | 0.21±0.09       |
|                         | <i>Chenopodium album</i>       | 0.14±0.02       |
|                         | <i>Potentilla chinensis</i>    | 0.09±0.01       |
| High altitude + Mowing  | <i>Bromus inermis</i>          | 0.33±0.03       |
|                         | <i>Alchemilla tianschanica</i> | 0.16±0.05       |
|                         | <i>Galium linearifolium</i>    | 0.14±0.04       |
|                         | <i>Geranium rotundifolium</i>  | 0.13±0.02       |
| High altitude + Grazing | <i>Stipa capillata</i>         | 0.33±0.02       |
|                         | <i>Potentilla chinensis</i>    | 0.20±0.04       |
|                         | <i>Trifolium repens</i>        | 0.17±0.03       |
|                         | <i>Achnatherum inebrians</i>   | 0.08±0.05       |

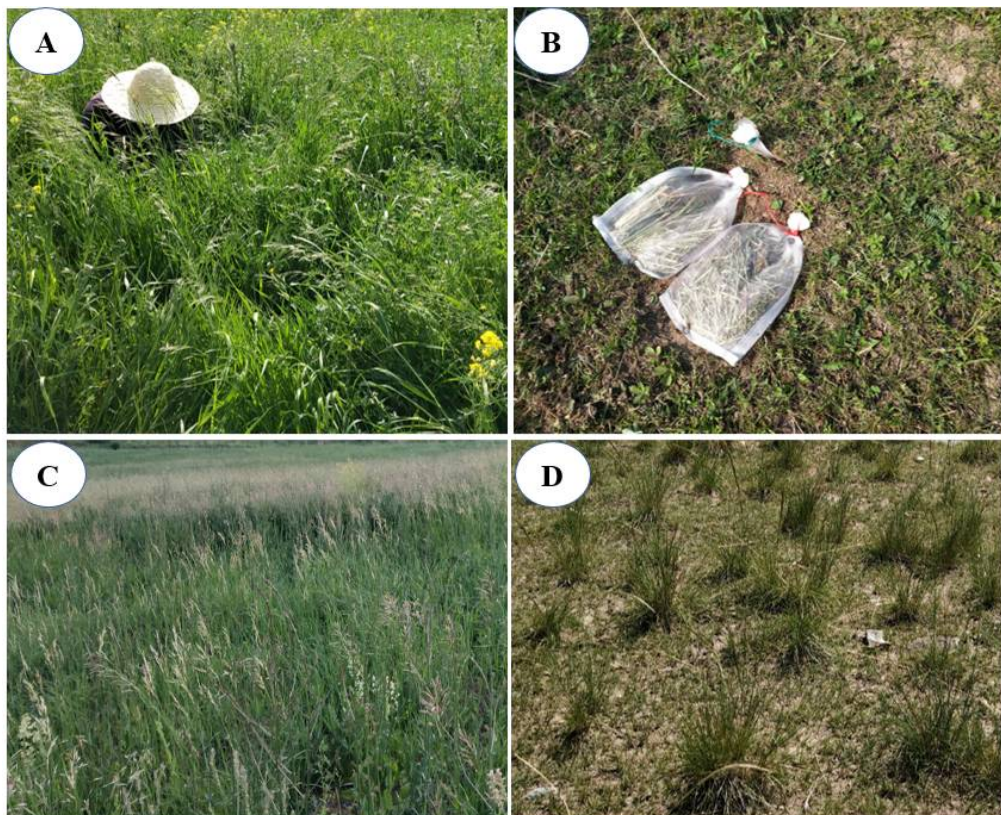

**Figure S1.** Litter decomposition plot habitat. A, high altitude + mowing; B, high altitude + grazing; C, low altitude + mowing; D, low altitude + grazing.

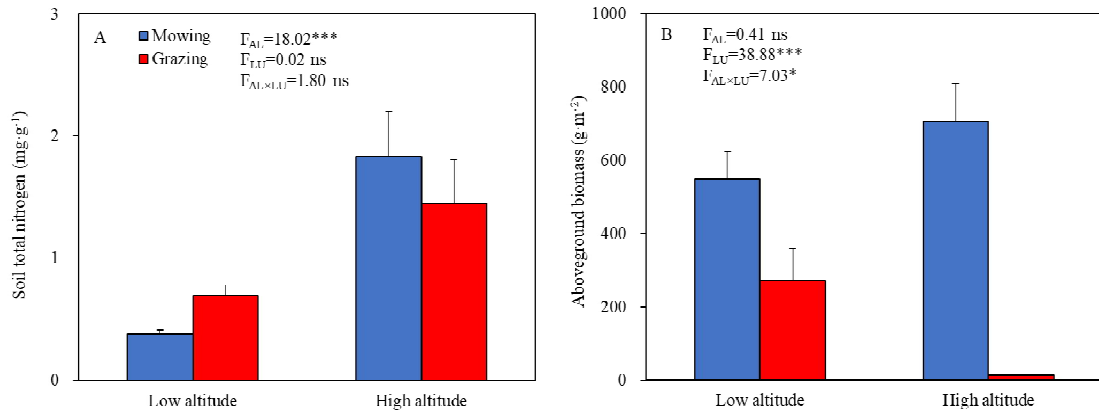

**Figure S2.** Effects of altitude and land-use type on (A) soil total nitrogen and (B) aboveground biomass (Mean  $\pm$  SE). The ns, \*, and \*\*\* represent  $p > 0.05$ ,  $p < 0.05$  and  $p < 0.001$ .

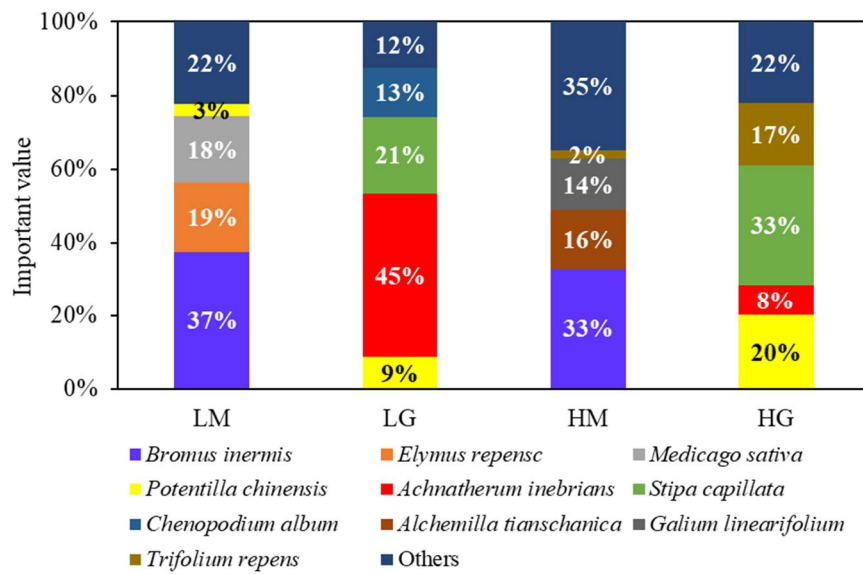

**Figure S3.** Proportion of important values of various species in different treatments. LM: low altitude + mowing; LG: low altitude + grazing; HM: high altitude + mowing; HG: high altitude + grazing.
